# Supplementary material for: Rapid Reverse Purification DNA Extraction Approaches to Identify Microbial Pathogens in Wastewater
Source: MDPI journal article supplement (doi:10.3390/microorganisms11030813), 2023-03-22
Supplement: s1 [file s1]

**S3 Comparison of cycle threshold and nucleic acid concentration measured by Nanodrop and Qubit for cell suspension of *S. aureus*, *E. coli* and *C. parvum* after extraction. DNA concentration by Nanodrop and Qubit was not an indication of good performance in real-time PCR.**

| Extraction protocol                                                                               | <i>S. aureus</i>                   |               |                |                 |                      | <i>E. coli</i>                     |           |               |               |                      | <i>C. parvum</i>                   |          |               |               |                      |
|---------------------------------------------------------------------------------------------------|------------------------------------|---------------|----------------|-----------------|----------------------|------------------------------------|-----------|---------------|---------------|----------------------|------------------------------------|----------|---------------|---------------|----------------------|
|                                                                                                   | Nucleic acid concentration (ng/μl) |               | 260/280        | 260/230         | Quantification cycle | Nucleic acid concentration (ng/μl) |           | 260/280       | 260/230       | Quantification cycle | Nucleic acid concentration (ng/μl) |          | 260/280       | 260/230       | Quantification cycle |
|                                                                                                   | Qubit                              | Nanodrop      |                |                 |                      | Qubit                              | Nanodrop  |               |               |                      | Qubit                              | Nanodrop |               |               |                      |
| No pre-treatment                                                                                  | 15.55                              | 59.10         | 0.61           | 0.18            | 20.92                | 3.68                               | 72.80     | 0.62          | 0.20          | 15.52                | 13.40                              | 0.00     | 0.02          | - 0.03        | 27.23                |
|                                                                                                   | (± 1.20)                           | (± 83.58)     | (± 0.06)       | (± 0.04)        | (± 1.07)             | (± 0.57)                           | (± 35.07) | (± 0.01)      | (± 0.01)      | (± 0.58)             | (± 0.50)                           | (± 0.92) | (± 0.13)      | (± 0.09)      | (± 0.30)             |
| Proteinase K                                                                                      | 35.50                              | 323.00        | 0.75           | 0.18            | 21.07                | 3.15                               | 53.10     | 0.70          | 0.27          | 15.27                | 13.80                              | 0.00     | 0.03          | - 1.11        | 26.30                |
|                                                                                                   | (± 0.71)                           | (± 216.09)    | (± 0.04)       | (± 0.01)        | (± 0.53)             | (± 0.77)                           | (± 27.29) | (± 1.17)      | (± 0.09)      | (± 0.11)             | (± 0.10)                           | (± 6.15) | (± 0.34)      | (± 1.86)      | (± 0.42)             |
| Alkaline treatment RT                                                                             | 20.65                              | 25.10         | 0.61           | 0.12            | 22.79                | 0.76                               | 31.15     | 0.58          | 0.14          | 18.70                | 12.80                              | 0.00     | 0.42          | 0.45          | 27.35                |
|                                                                                                   | (± 2.76)                           | (± 8.49)      | (± 0.03)       | (± 0.01)        | (± 2.09)             | (± 1.07)                           | (± 6.01)  | (± 0.01)      | (± 0.01)      | (± 1.34)             | (± 0.40)                           | 0.00     | 0.41          | (± 0.16)      | (± 0.33)             |
| Alkaline treatment 95°C                                                                           | 24.45                              | 41.60         | 1.21           | 0.50            | 20.07                | 1.81                               | 24.05     | 0.63          | 0.16          | 15.69                | 13.30                              | 0.00     | 0.41          | 0.31          | 26.54                |
|                                                                                                   | (± 0.21)                           | (± 36.63)     | (± 0.58)       | (± 0.46)        | (± 0.32)             | (± 0.57)                           | (± 0.78)  | (± 0.02)      | (± 0.01)      | (± 0.35)             | (± 0.80)                           | 0.00     | (± 0.01)      | (± 0.10)      | (± 0.59)             |
| Bead beating                                                                                      | 15.55                              | 23.75         | 0.84           | 0.18            | 17.13                | 1.33                               | 18.25     | 0.84          | 0.12          | 17.59                | 14.70                              | 0.00     | 0.39          | - 0.53        | 30.89                |
|                                                                                                   | (± 0.35)                           | (± 4.74)      | (± 0.27)       | (± 0.06)        | (± 0.66)             | (± 0.33)                           | (± 13.36) | (± 0.46)      | (± 0.01)      | (± 0.31)             | (± 0.40)                           | 0.00     | (± 0.02)      | (± 1.98)      | (± 0.21)             |
| No extraction                                                                                     | 13.80                              | 7.10          | 2.69           | - 0.76          | 23.88                | 15.60                              | 56.15     | 0.57          | 0.18          | 17.18                | 13.00                              | 0.00     | 0.85          | 0.36          | 31.83                |
|                                                                                                   | (± 0.28)                           | (± 1.27)      | (± 0.82)       | (± 0.32)        | (± 0.42)             | (± 4.95)                           | (± 79.41) | (± 0.02)      | (± 0.11)      | (± 0.43)             | (± 0.20)                           | 0.00     | (± 0.11)      | (± 0.03)      | (± 0.79)             |
| Only bead beating                                                                                 | 14.50                              | 16.40         | 2.14           | 1.75            | 16.81                | 1.74                               | 23.95     | 1.72          | - 2.71        | 17.11                | 13.00                              | 4.60     | 1.21          | 0.49          | 30.20                |
|                                                                                                   | (± 1.98)                           | (± 14.14)     | (± 0.11)       | (± 0.63)        | (± 0.01)             | (± 0.05)                           | (± 33.87) | (± 0.04)      | (± 3.42)      | (± 0.23)             | (± 0.80)                           | (± 1.27) | (± 0.07)      | (± 0.02)      | (± 0.76)             |
| Spin column                                                                                       | 16.80                              | 0.00          | 0.18           | 0.63            | 19.34                | 5.38                               | 1.70      | 0.73          | - 0.05        | 17.45                | 13.50                              | 0.00     | 0.54          | 0.38          | 28.41                |
|                                                                                                   | (± 2.40)                           |               | (± 0.04)       | (± 0.03)        | (± 0.47)             | (± 1.17)                           | (± 1.98)  | (± 1.54)      | (± 0.06)      | (± 0.47)             | (± 0.10)                           | 0.00     | (± 0.08)      | (± 0.58)      | (± 0.92)             |
| Spin column + bead beating                                                                        | 15.35 (± 0.49)                     | 9.20 (± 4.10) | 0.40 (± 10.51) | - 6.87 (± 8.51) | 17.40 (± 0.54)       | 0.00                               | 0.00      | 1.02 (± 0.21) | 0.09 (± 0.01) | 23.34 (± 0.11)       | 13.20 (± 0.60)                     | 0.00     | 0.70 (± 0.11) | 0.42 (± 0.11) | 30.16 (± 0.74)       |
| Pairwise correlation of nucleic acid concentration with corresponding C <sub>q</sub> <sup>1</sup> | 0.228                              | 0.087         |                |                 |                      | - 0.548                            | - 0.468   |               |               |                      | - 0.09                             | 0.493    |               |               |                      |

<sup>1</sup> in term of correlation coefficient r

RT = room temperature

C<sub>q</sub> = quantification cycle
